# Supplementary material for: Prevalence of Signs of Severity Identified in the Thai Population with Malaria: A Systematic Review and Meta-Analysis
Source: MDPI journal article supplement (doi:10.3390/ijerph19031196), 2022-01-21
Supplement: s1 [file s1]

# **Prevalence of signs of severity identified in the Thai population with malaria: a systematic review and meta-analysis**

Wanida Mala <sup>1</sup>, Polrat Wilairatana <sup>2</sup>, Chutharat Samerjai <sup>1</sup>, Frederick Ramirez Masangkay <sup>3</sup>,  
Kwuntida Uthaisar Kotepui <sup>1</sup> and Manas Kotepui <sup>1,\*</sup>

<sup>1</sup>Medical Technology, School of Allied Health Sciences, Walailak University, Tha Sala, Nakhon Si Thammarat, Thailand; kwuntida.ut@wu.ac.th

<sup>2</sup>Department of Clinical Tropical Medicine, Faculty of Tropical Medicine, Mahidol University, Bangkok, Thailand; polrat.wil@mahidol.ac.th

<sup>3</sup>Department of Medical Technology, Faculty of Pharmacy, University of Santo Tomas, Manila, Philippines; frederick\_masangkay2002@yahoo.com

\*Correspondence: manas.ko@wu.ac.th; Tel.: +66954392469

**Table S1. Search term**

| <b>Databases</b> | <b>Search terms/Search strategy</b>                                                                   | <b>Date</b>   |
|------------------|-------------------------------------------------------------------------------------------------------|---------------|
| MEDLINE          | ("severe malaria" OR "complicated malaria") AND (Thai OR Thailand OR Siam)<br><br>Search results: 299 | 8 August 2021 |

|                |                                                                                                                                                          |                  |
|----------------|----------------------------------------------------------------------------------------------------------------------------------------------------------|------------------|
| Scopus         | ("severe malaria" OR "complicated malaria") AND (Thai<br>OR Thailand OR Siam)<br><br>Search option: Title, abstract, keywords<br><br>Search results: 142 | 8 August<br>2021 |
| Web of Science | ("severe malaria" OR "complicated malaria") AND (Thai<br>OR Thailand OR Siam)<br><br>Search option: All fields<br><br>Search results: 300                | 8 August<br>2021 |
