# Supplementary material for: Prevalence of Signs of Severity Identified in the Thai Population with Malaria: A Systematic Review and Meta-Analysis
Source: MDPI journal article supplement (doi:10.3390/ijerph19031196), 2022-01-21
Supplement: s1 [file s1]

**Prevalence of signs of severity identified in the Thai population with malaria: a systematic review and meta-analysis**

Wanida Mala <sup>1</sup>, Polrat Wilairatana <sup>2</sup>, Chutharat Samerjai <sup>1</sup>, Frederick Ramirez Masangkay <sup>3</sup>, Kwuntida Uthaisar Kotepui <sup>1</sup> and Manas Kotepui <sup>1</sup>\*

<sup>1</sup>Medical Technology, School of Allied Health Sciences, Walailak University, Tha Sala, Nakhon Si Thammarat, Thailand; kwuntida.ut@wu.ac.th

<sup>2</sup>Department of Clinical Tropical Medicine, Faculty of Tropical Medicine, Mahidol University, Bangkok, Thailand; polrat.wil@mahidol.ac.th

<sup>3</sup>Department of Medical Technology, Faculty of Pharmacy, University of Santo Tomas, Manila, Philippines; frederick\_masangkay2002@yahoo.com

\*Correspondence: manas.ko@wu.ac.th; Tel.: +66954392469

**Table S2. Quality of the included studies**

**JBI Critical Appraisal Checklist for Randomized Controlled Trials**

|    | Study                       | Score (out of 13) | Score (percentage) | Quality                       |
|----|-----------------------------|-------------------|--------------------|-------------------------------|
| 1. | Charunwatthana et al., 2009 | 13                | 100                | High                          |
| 2. | Krudsood et al., 2003       | 7                 | 53                 | Moderate or low-quality study |

|    |                           |   |    |                               |
|----|---------------------------|---|----|-------------------------------|
| 3. | Looareesuwan et al., 1995 | 7 | 53 | Moderate or low-quality study |
| 4. | Wilairatna et al., 2000   | 7 | 53 | Moderate or low-quality study |

#### **JBI Critical Appraisal Checklist for Studies Reporting Prevalence Data**

|    | <b>Study</b>             | <b>Score (out of 9)</b> | <b>Score (percentage)</b> | <b>Quality</b> |
|----|--------------------------|-------------------------|---------------------------|----------------|
| 1. | Chuncharunee et al. 1997 | 7                       | 78                        | High           |
| 2. | Dondorp et al., 2005     | 9                       | 100                       | High           |
| 3. | Luxemburger et al., 1997 | 9                       | 100                       | High           |
| 4. | Newton et al., 2013      | 9                       | 100                       | High           |
| 5. | Niphakasem B., 2006      | 7                       | 78                        | High           |
| 6. | Sagaki et al., 2013      | 9                       | 100                       | High           |
| 7. | Wilairatana et al., 1994 | 8                       | 89                        | High           |
| 8. | Win et al., 2012         | 9                       | 100                       | High           |
